# Supplementary material for: C. elegans monitor energy status via the AMPK pathway to trigger innate immune responses against bacterial pathogens
Source: Commun Biol. 2022 Jun 30;5:643. doi: 10.1038/s42003-022-03589-1 (PMC9246835; doi:10.1038/s42003-022-03589-1)
Supplement: Supplementary file 8 — Supplementary Data 5 [file 42003_2022_3589_MOESM8_ESM.xlsx]

## Sheet: op50vsGene1
Gene Information			Expression		Regulation
GeneID	GeneName	Description	BMB171/Cry5Ba	BMB171/pHT304	log2(BMB171/Cry5Ba：BMB171/pHT304)	Regulation	p_value	q_value
gene6428	F13H8.5	Uncharacterized protein	75.9037	2.91085	4.70466	up	5e-05	0.00110206
gene37476	cdr-2	CaDmium Responsive	153.904	5.26997	4.86809	up	5e-05	0.00110206
gene6838	aqp-1	AQuaPorin or aquaglyceroporin related	347.135	35.4196	3.29288	up	5e-05	0.00110206
gene36456	ugt-1	UDP-GlucuronosylTransferase	36.6823	5.79149	2.66308	up	0.0005	0.00687417
gene33911	lys-7	LYSozyme	2183.93	315.886	2.78945	up	5e-05	0.00110206
gene37266	cpr-1	Gut-specific cysteine proteinase	4006.84	397.517	3.33338	up	5e-05	0.00110206
gene37731	far-3	Fatty Acid/Retinol binding protein	872.305	73.4122	3.57074	up	5e-05	0.00110206
gene6836	F32A5.4	Uncharacterized protein	529.961	226.168	1.2285	up	0.00385	0.0280498
gene34053	cyp-35B2	CYtochrome P450 family	1.57711	0	-	up	5e-05	0.00110206
gene35199	ugt-41	UDP-GlucuronosylTransferase	61.749	17.4506	1.82314	up	0.00205	0.018779
gene14157	W03D2.6	-	38.816	5.1331	2.91875	up	0.0009	0.010484
gene18537	T01B11.2	Non-coding transcript of protein-coding gene T01B11.2b	70.0852	27.8623	1.3308	up	0.00575	0.0366781
gene45380	tre-4	Trehalase	15.8931	2.59933	2.61219	up	0.0024	0.0206697
gene46574	sod-3	Sdowneroxide dismutase [Mn	174.192	5.13463	5.08428	up	0.0003	0.00471148
gene46329	mua-6	Intermediate filament protein ifa-2	75.5334	9.65731	2.96742	up	5e-05	0.00110206
gene7713	ZK1320.2	Uncharacterized protein	984.502	271.272	1.85965	up	5e-05	0.00110206
gene6809	C27H5.2	Uncharacterized protein	38.2199	10.1664	1.91052	up	0.00275	0.0224019
gene41664	K09C4.5	Uncharacterized protein	29.6851	0.885558	5.06701	up	0.00515	0.0340992
gene5702	pacs-1	Phosphoribosylaminoimidazole-succinocarboxamide synthase	95.8617	10.0207	3.25798	up	5e-05	0.00110206
gene5763	che-10	Uncharacterized protein	7.95888	2.74119	1.53776	up	0.00895	0.0479293
gene18370	mec-17	Uncharacterized protein	91.7828	25.7511	1.83359	up	0.0053	0.0348
gene43792	asns-2	ASparagiNe Synthetase	87.9628	36.1964	1.28105	up	0.0072	0.0420097
gene3505	asah-1	Acid ceramidase	246.328	99.1689	1.31262	up	0.0023	0.0202726
gene1046	icmt-1	Protein-S-isoprenylcysteine O-methyltransferase	142.265	14.7382	3.27094	up	0.00015	0.0027619
gene13479	clec-166	C-type LECtin	46.1124	2.45621	4.23065	up	0.0019	0.0177989
gene8371	F54D5.3	Uncharacterized protein	1492.35	601.891	1.31001	up	0.002	0.0184435
gene18883	hsp-12.3	Heat Shock Protein	611.242	35.2495	4.11607	up	0.00205	0.018779
gene43507	dao-3	Dauer or Aging adult Overexpression	127.128	41.9313	1.60018	up	0.00275	0.0224019
gene45740	nspc-20	Nematode Specific Peptide family, grodown C	3909.9	659.657	2.56734	up	0.00025	0.00406508
gene33225	ges-1	Gut esterase 1	102.05	8.10151	3.65495	up	5e-05	0.00110206
gene18276	klo-1	KLOtho (mammalian aging-associated protein) homolog	58.6028	14.9294	1.97281	up	0.00135	0.0140456
gene37220	sodh-1	Alcohol dehydrogenase 1	2960.45	368.769	3.00502	up	5e-05	0.00110206
gene35765	asp-13	ASpartyl Protease	791.394	51.9874	3.92816	up	5e-05	0.00110206
gene43308	PDB1.1	Uncharacterized protein	103.311	10.8913	3.24575	up	0.0002	0.00345935
gene36330	C08B6.4	Uncharacterized protein	7.43601	1.1773	2.65904	up	0.00875	0.0471787
gene34051	cyp-35B1	CYtochrome P450 family	13.0896	1.17038	3.48336	up	0.00225	0.0200561
gene34070	cyp-34A9	CYtochrome P450 family	105.14	35.0499	1.58483	up	0.0007	0.00881148
gene45018	nspc-14	Nematode Specific Peptide family, grodown C	4108.23	817.079	2.32997	up	0.00015	0.0027619
gene20094	thn-2	THaumatiN family	469.123	64.6843	2.85848	up	5e-05	0.00110206
gene41606	gpd-2	Glyceraldehyde-3-phosphate dehydrogenase 2	596.105	179.136	1.73451	up	0.0001	0.00197766
gene6143	lys-8	LYSozyme	732.625	256.151	1.51608	up	0.00075	0.00925093
gene33968	T22F3.11	Uncharacterized protein	226.012	14.7973	3.93299	up	5e-05	0.00110206
gene35305	ddo-2	Non-coding transcript of protein-coding gene ddo-2	127.531	44.4142	1.52175	up	0.00445	0.030911
gene38124	D1086.3	Uncharacterized protein	346.155	6.58868	5.71528	up	0.00065	0.0083666
gene35003	mtl-1	Metallothionein-1	3362.77	306.807	3.45425	up	0.0036	0.0269886
gene33237	hacd-1	Hydroxy-Acyl-CoA Dehydrogenase	243.556	59.3528	2.03687	up	5e-05	0.00110206
gene2322	hgo-1	Homogentisate 1,2-dioxygenase	142.692	44.0145	1.69686	up	0.00055	0.00740175
gene7759	cyp-13A4	Putative cytochrome P450 CYP13A4	3.89992	0	-	up	5e-05	0.00110206
gene42950	F38B6.4	Phosphoribosylglycinamide formyltransferase	18.6016	1.27288	3.86926	up	0.00055	0.00740175
gene36868	T19B10.2	Uncharacterized protein	610.565	67.503	3.17712	up	5e-05	0.00110206
gene20571	C08F11.3	Uncharacterized protein	22.3039	0	-	up	5e-05	0.00110206
gene37857	cpz-2	CathePsin Z	223.669	67.539	1.72758	up	0.00015	0.0027619
gene35159	npa-1	Nematode Polyprotein Allergen related	407.445	42.3699	3.26549	up	5e-05	0.00110206
gene37903	ttr-44	TransThyretin-Related family domain	865.025	15.4986	5.80254	up	5e-05	0.00110206
gene5600	bcmo-2	Beta-Carotene 15,15'-MonoOxygenase	17.6356	2.9188	2.59504	up	0.0031	0.0242277
gene42614	F13D11.4	Uncharacterized protein	79.3475	13.0769	2.60116	up	5e-05	0.00110206
gene6533	T28D9.3	Uncharacterized protein	52.078	13.2464	1.97507	up	0.0044	0.0306795
gene42727	nnt-1	Nicotinamide Nucleotide Transhydrogenase	71.919	6.3701	3.49699	up	5e-05	0.00110206
gene1877	nas-36	Zinc metalloproteinase nas-36	23.659	3.50054	2.75674	up	0.00195	0.0181441
gene45965	F09B12.3	Putative phospholipase B-like 2	77.6387	13.8803	2.48374	up	5e-05	0.00110206
gene43779	F53A9.1	Uncharacterized protein	588.638	11067.5	-4.23281	down	0.00025	0.00406508
gene10771	Y32H12A.8	Uncharacterized protein	5.04705	11.7488	-1.21901	down	0.00555	0.0357885
gene3494	nlp-39	Neuropeptide-Like Protein	0	191.826	-	down	0.00015	0.0027619
gene20389	ttr-51	TransThyretin-Related family domain	1353.13	6874.93	-2.34504	down	5e-05	0.00110206
gene40036	scl-19	SCP-Like extracellular protein	0	1.18213	-	down	0.0046	0.0315165
gene37492	pals-39	Protein containing ALS2cr12 (ALS2CR12) domain	18.8237	53.8854	-1.51734	down	0.00525	0.0345677
gene18436	clec-52	C-type LECtin	45.2752	136.874	-1.59606	down	0.0021	0.0190682
gene6021	vhp-1	Tyrosine-protein phosphatase vhp-1	43.1829	111.735	-1.37155	down	0.00225	0.0200561
gene19263	Y43C5A.3	Uncharacterized protein	97.4602	487.754	-2.32327	down	0.0056	0.0359988
gene33341	hsp-16.2	Heat shock protein Hsp-16.2	168.227	2329.1	-3.79129	down	5e-05	0.00110206
gene12793	Y56A3A.33	Uncharacterized protein	5.26899	29.3384	-2.47719	down	0.00475	0.0321057
gene18268	C50F7.5	Uncharacterized protein	244.016	670.186	-1.45759	down	0.00125	0.0133406
gene7357	C34C6.7	Uncharacterized protein	18.8535	147.434	-2.96716	down	5e-05	0.00110206
